# Supplementary material for: SMALL LEAF AND BUSHY1 controls organ size and lateral branching by modulating the stability of BIG SEEDS1 in Medicago truncatula
Source: PubMed Central journal article supplement (PMC7317789; doi:10.1111/nph.16449), 2020-02-19
Supplement: NPH-226-1399-s001.pdf [file NPH-226-1399-s001.pdf]

## **New Phytologist Supporting Information Figs S1–S10 and Table S1**

**Article title:** SMALL LEAF AND BUSHY1 controls organ size and lateral branching by modulating the stability of BIG SEED1 in *Medicago truncatula*

**Authors:** Pengcheng Yin, Qingxia Ma, Hui Wang, Dan Feng, Xianbing Wang, Yanxi Pei, Jiangqi Wen, Million Tadege, Lifang Niu and Hao Lin

**Article acceptance date:** 11 January 2020

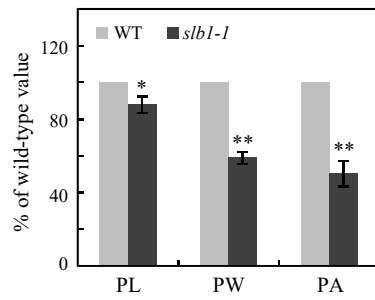

**Fig. S1 Comparison of vexillum petal size of *M. truncatula* wild type and *sbl-1*.**

Vexillum petal length (PL), vexillum petal width (PW), vexillum petal area (PA) of the wild type (WT) and *sbl-1*. Bars represent means  $\pm$  SD ( $n = 15$ ); asterisks indicate significant differences from WT (\* $P < 0.05$ , \*\* $P < 0.01$ , Student's  $t$  test).

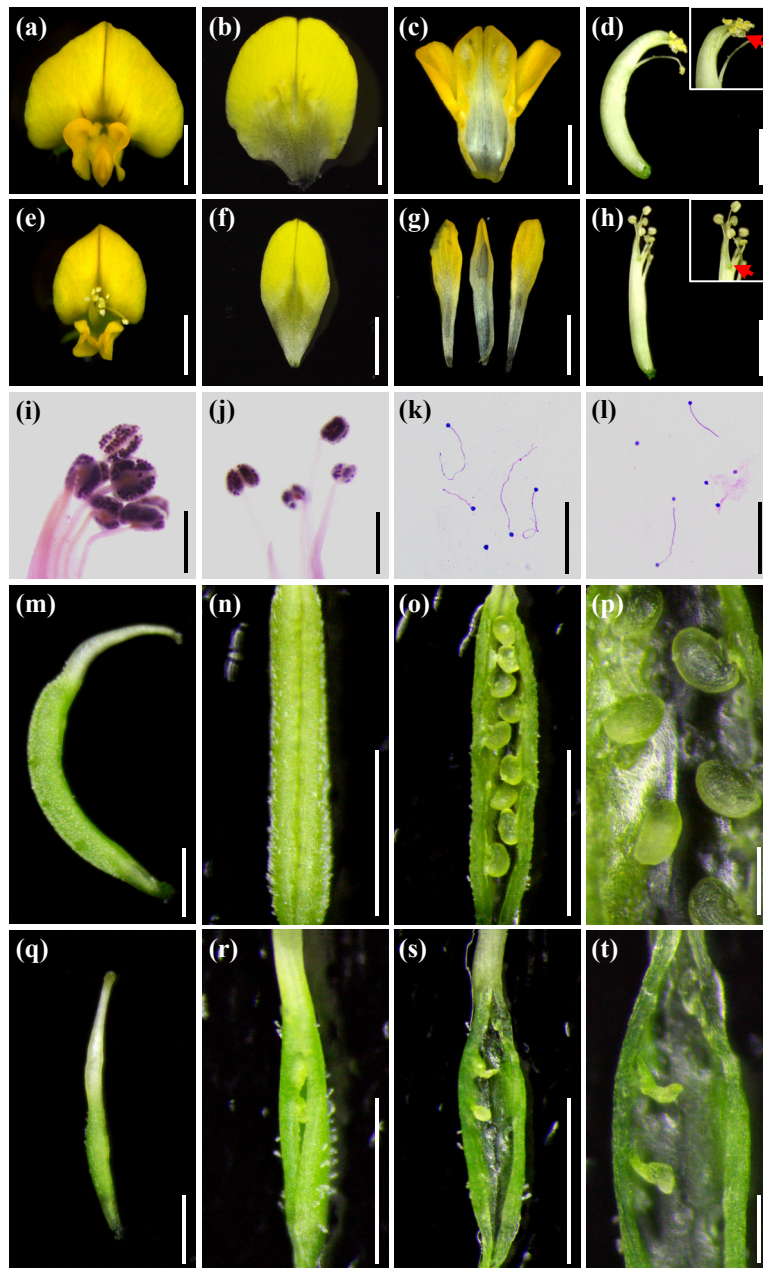

**Fig. S2 The *M. truncatula* *slb1* mutant shows defects in floral organ development.**

(a-d) The mature flower (a), dissected vexillum petal (b), the fused alae and keel petals (c), and the stamens and carpel (d) of wild-type (WT) *M. truncatula*. The inset is the magnification of anthers. Red arrow indicates the stigma. Bars = 2 mm. (e-h) The mature flower (e), dissected vexillum petal (f), the alae and keel petals (g), and the stamens and carpel (h) of *slb1-1*. The inset is the magnification of anthers. Red arrow indicates the stigma. Bars = 2 mm. (i, j) Pollen staining in WT (i) and *slb1-1* (j). Bars = 0.5 mm. (k, l) *In vitro* pollen tube germination of WT (k) and *slb1-1* (l). Bars = 0.5 mm. (m-p) The carpels (m, n) and ovules (o, p) of WT. Bars = 1 mm in (m-o), and 0.2 mm in (p). (q-t) The carpels (q, r) and ovules (s, t) of the *slb1-1* mutant. Bars = 1 mm in (q-s), and 0.2 mm in (t).

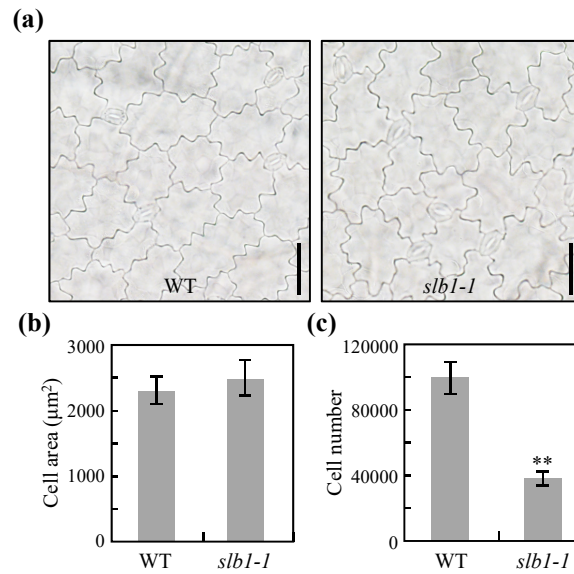

**Fig. S3 Disruption of *SLB1* leads to significant decreases in leaf size, primarily by affecting cell proliferation in *M. truncatula*.**

(a) Micrographs of cleared wild-type (WT) and *slb1-1* leaves. Bars = 50 µm. (b) Comparison of cell area in WT and *slb1-1* leaves. Bars represent means  $\pm$  SD ( $n = 15$ ). (c) Comparison of cell number in WT and *slb1-1* leaves. Bars represent means  $\pm$  SD ( $n = 15$ ); asterisks indicate significant differences from the WT (\*\* $P < 0.01$ , Student's  $t$  test).

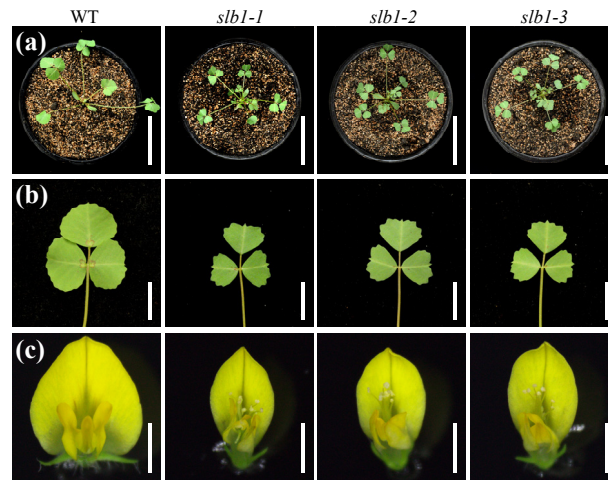

**Fig. S4 Phenotypes of the *M. truncatula* wild type and *slb1* alleles.**

(a) 3-week-old seedlings of the wild type (WT) and *slb1* alleles. Bars = 5 cm. (b, c) Phenotypes of leaves (b) and flowers (c) of WT and *slb1* mutants. Bars = 1 cm for leaves and 2 mm for flowers.

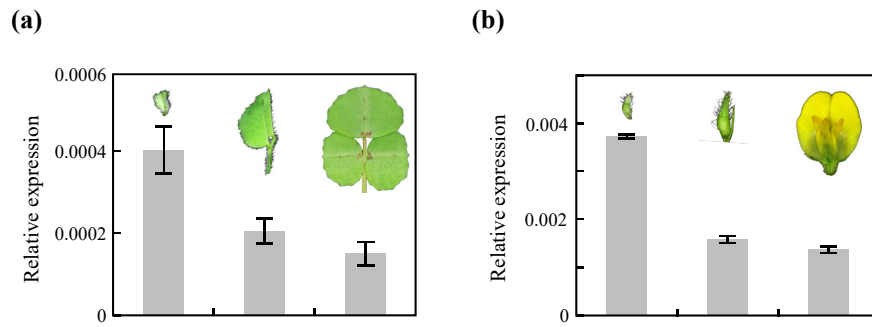

**Fig. S5 Transcript abundance of *SLB1* in *M. truncatula* leaves and flowers at different developmental stages.**

Quantitative RT-PCR analysis of *SLB1* expression in leaves (a) and flowers (b) at different developmental stages. Bars represent means  $\pm$  SD ( $n = 3$ ).

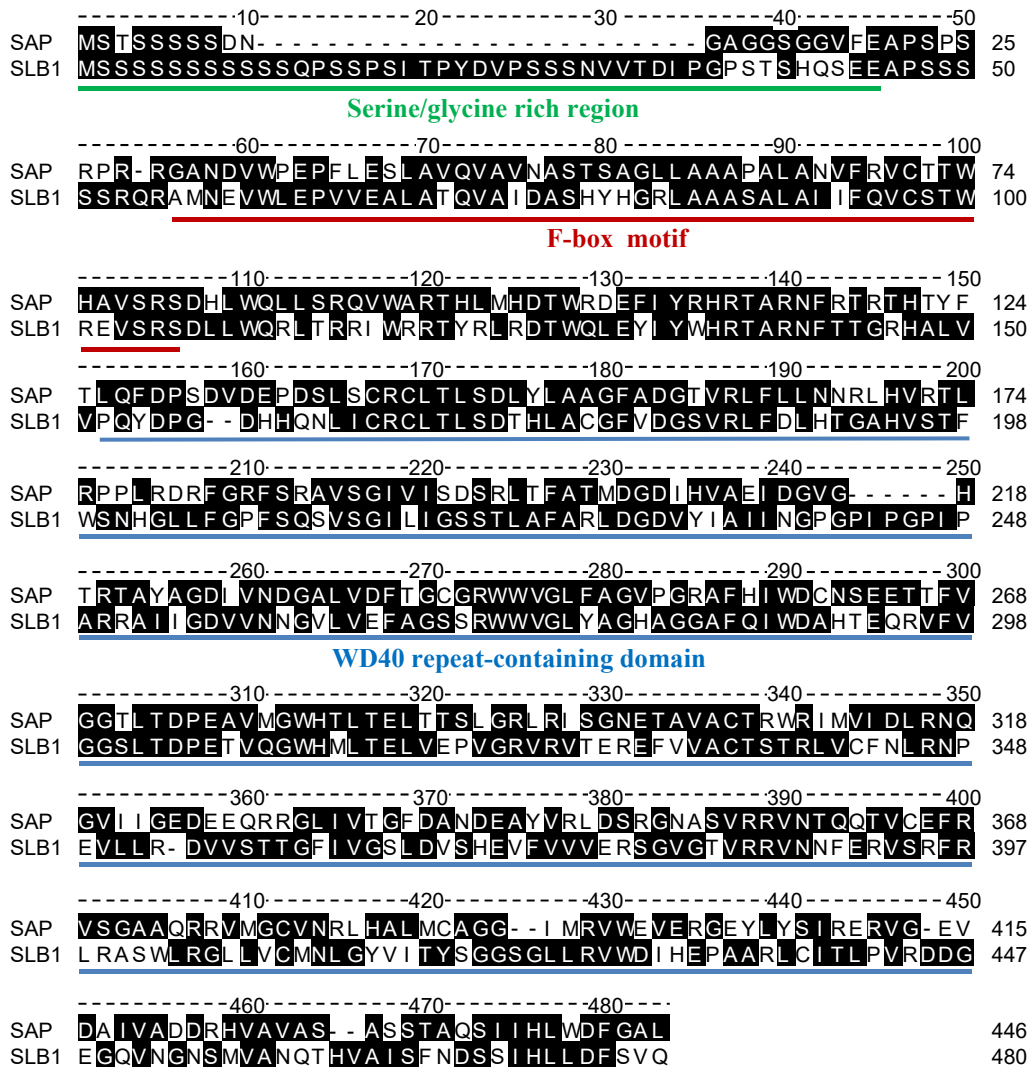

**Fig. S6** Sequence alignment of *M. truncatula* SLB1 and *Arabidopsis* SAP.

The conserved serine/glycine rich region, F-box motif, and WD40 repeat-containing domain sequences are underlined in green, red, and blue, respectively.

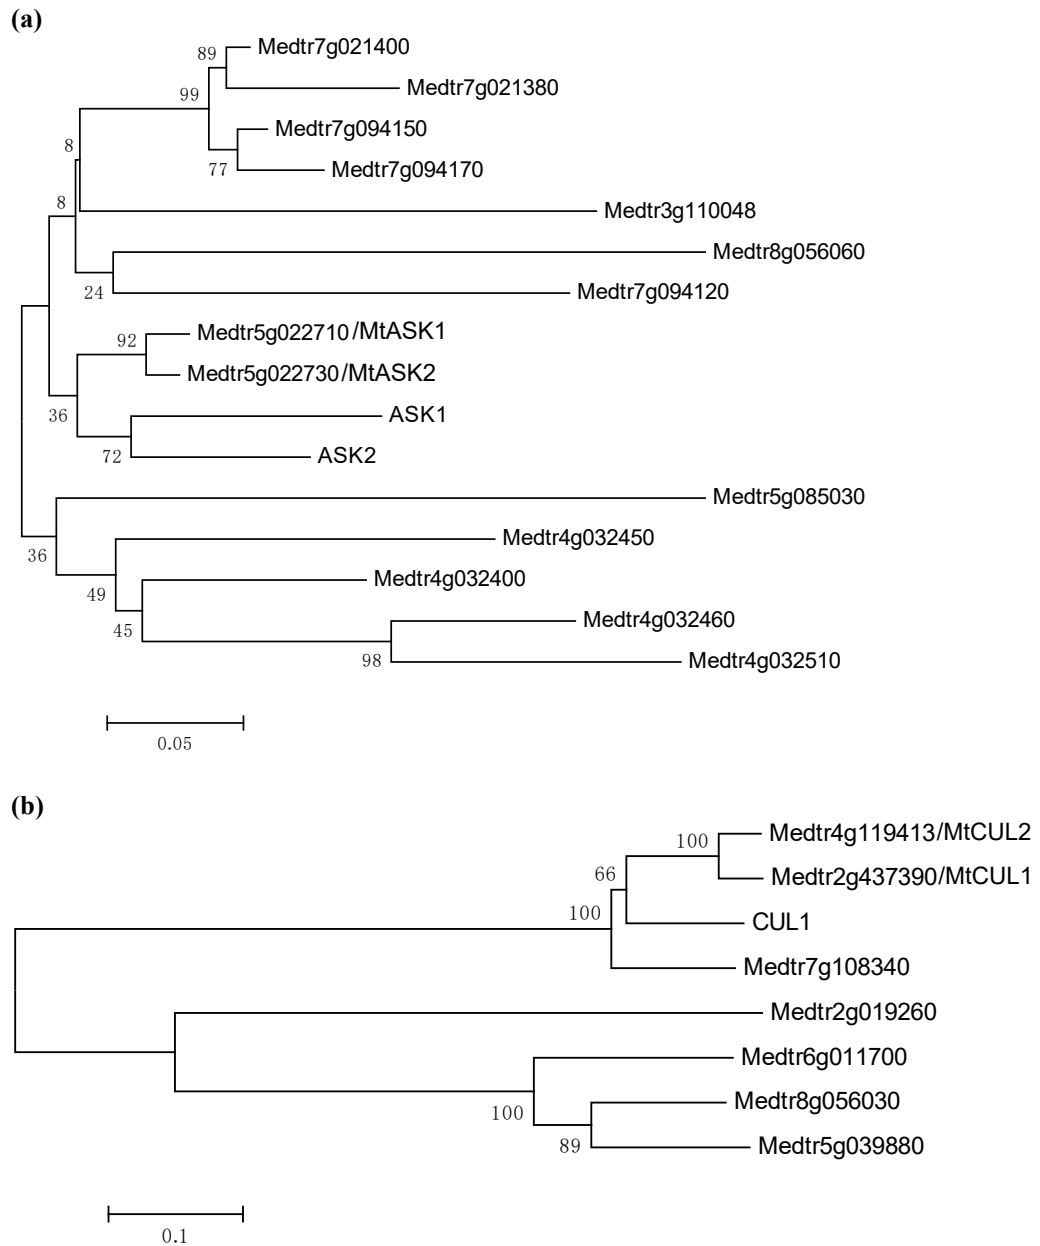

**Fig. S7 Phylogenetic analysis of ASK1/2-like and CUL1-like family proteins in *M. truncatula*.**

Phylogenetic analysis of *M. truncatula* ASK1/2-like (a) and CUL1-like (b) proteins. The protein sequences were obtained from the *Medicago truncatula* Genome Database (<http://www.medicagogenome.org>). Full-length amino acid sequences were aligned using ClustalW, and the trees were constructed using MEGA6.0 with 1000 replicates to generate bootstrap values.



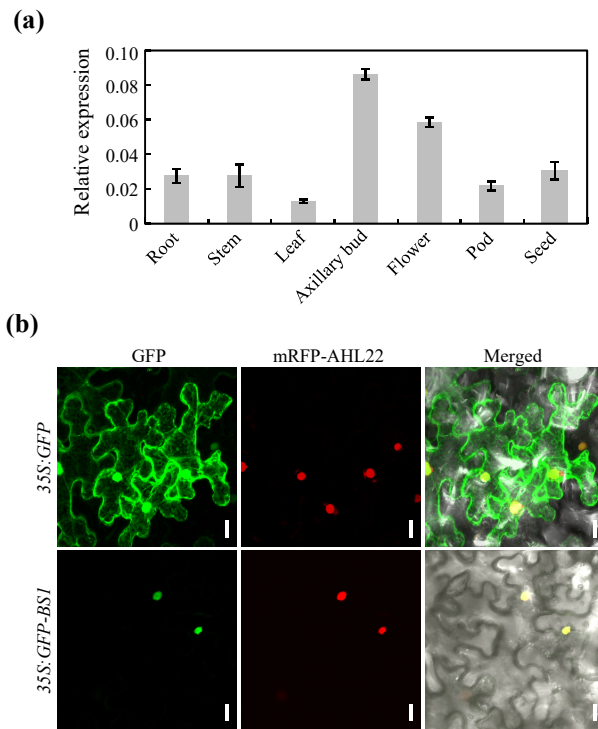

**Fig. S8 Expression pattern of *BS1* in *M. truncatula* and subcellular localization of BS1.** (a) Transcript levels of *BS1* in different *M. truncatula* tissues, as revealed by quantitative RT-PCR. *MtActin* was used as an internal control. Bars represent means  $\pm$  SD ( $n = 3$ ). (b) Subcellular localization of GFP and GFP-BS1 in tobacco leaf epidermal cells. The nuclear protein AHL22 was used as a nuclear localization marker. Bars = 20  $\mu$ m.

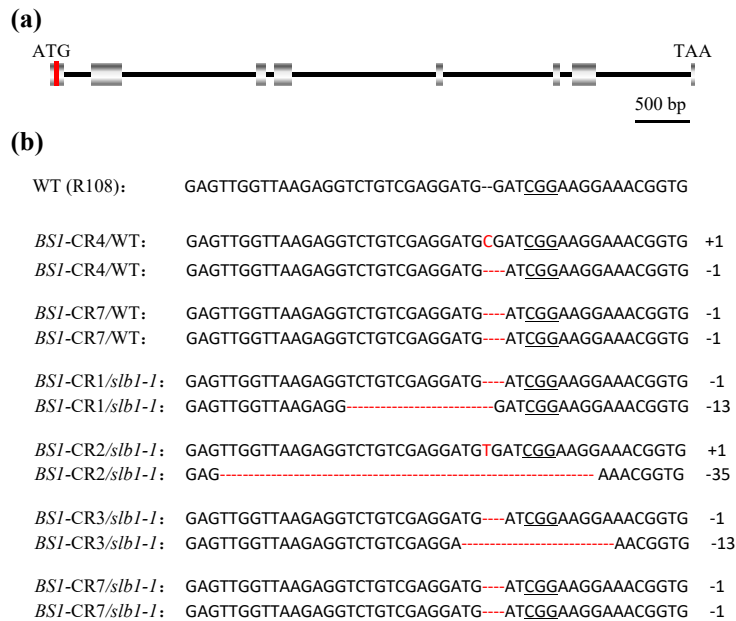

**Fig. S9 Targeted mutagenesis of *M. truncatula* *BSI* using the CRISPR/Cas9 system.**

(a) Schematic representation of the gene structure of *BSI*. The red line indicates the CRISPR/Cas9 target site. (b) Nucleotide sequence of wild-type (WT) *BSI* aligned to the sequences of the mutant alleles. Red font indicates base deletions or insertions; the protospacer adjacent motifs are underlined.

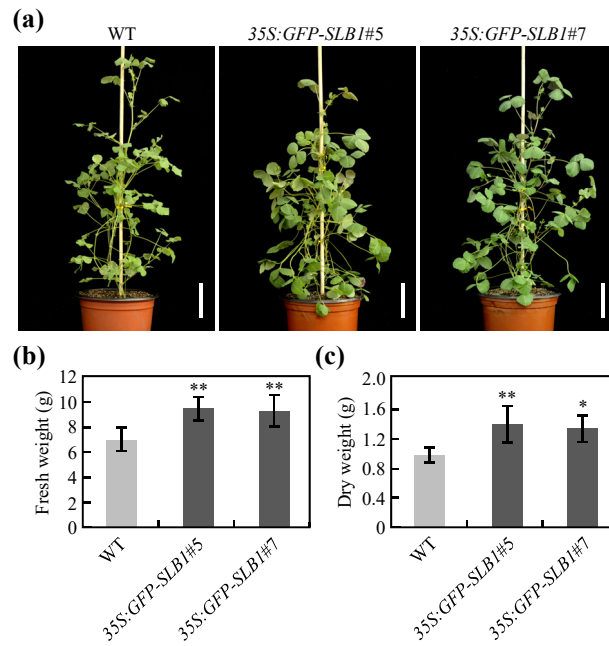

**Fig. S10 *SLB1* overexpression improves biomass yield in *M. truncatula*.**

(a) Morphology of 9-week-old wild-type (WT) and *SLB1* overexpressing *M. truncatula* plants. Bars = 5 cm. (b, c) Comparison of fresh (b) and dry (c) weights of aboveground biomass in 9-week-old WT and *SLB1* overexpressors. Bars represent means  $\pm$  SD ( $n = 5$ ); asterisks indicate significant differences from WT (\* $P < 0.05$ , \*\* $P < 0.01$ , Dunnett's test).

**Table S1. Primers used in this study**

| <b>Primers</b>             | <b>Sequences 5'-3'</b>                                          | <b>Application</b>                                              |
|----------------------------|-----------------------------------------------------------------|-----------------------------------------------------------------|
| SLB1-NF11180<br>/NF19156-F | ATGGTTGGAAAATGCATGC                                             | For genotyping of <i>slb1-1</i><br>and <i>slb1-3</i>            |
| SLB1-NF11180<br>/NF19156-R | ATTATTCACGCGCCGAACA                                             |                                                                 |
| SLB1-NF20634-F             | TTTGTTCAACATGGAGGGAA                                            | For genotyping of <i>slb1-2</i>                                 |
| SLB1-NF20634-R             | AGTTCCAACACCACTTCTTT                                            |                                                                 |
| LTR6                       | GCTACCAACCAAACCAAGTCAA                                          | Primers in <i>Tnt1</i> for<br>genotyping of different<br>mutant |
| LTR31                      | CTCCTCTCGGGTTCGTGGTT                                            |                                                                 |
| gSLB1-F                    | CCATGATTACGAATTCCAACCGTCAACAT<br>GAAATGAATCCA                   | To amplify gDNA of <i>SLB1</i>                                  |
| gSLB1-R                    | GTCGACAGATCCCCGGGACTAATATGTGG<br>TCTTGCTAGCCA                   |                                                                 |
| pSLB1-F                    | CACCCAACCGTCAACATGAAATGAATCCA                                   | To amplify promoter of<br><i>SLB1</i>                           |
| pSLB1-R                    | GAGGAGTGAGAGAAGTGGAGGG                                          |                                                                 |
| GFP-attB1-F                | GGGGACAAGTTTGTACAAAAAAGCAGGCT<br>TCATGGGTAAAGGAGAACTTTTCA       | To amplify CDS of <i>GFP</i>                                    |
| 6*Gly-GFP-R                | GCCACCCCCTCCGCCACCGGCATAATCAG<br>GCACATCG                       |                                                                 |
| 6*Gly-SLB1-F               | GGTGGCGGAGGGGGTGGCATGTCTTCTTC<br>TTCCTCCTCCT                    | To amplify CDS of <i>SLB1</i>                                   |
| SLB1-attB2-R               | GGGGACCACTTTGTACAAGAAAGCTGGGT<br>CTTACTGTACACTAAAATCCAATA       |                                                                 |
| BS1CDS-F                   | CACCATGAACGGCGGAAGCACCGTTTCCT                                   | To amplify CDS of <i>BS1</i>                                    |
| BS1CDS-R                   | TTAGCATTCTTGAACATCTTTATCATTC                                    |                                                                 |
| MtU6-F1                    | GCTTAGGCCTTCTAGAATCCAACATTTTAC<br>TTGAGTAACT                    | To amplify <i>MtU6</i><br>promoter                              |
| MtU6-R1                    | AAACCCTGCTGTTTCGTCTAG                                           |                                                                 |
| BS1-sgRNA-F                | CTAGACGAACAGCAGGGTTTGAGGTCTGT<br>CGAGGATGGATGTTTTAGAGCTAGAAATAG | To amplify sg<br>RNA-scaffold fragment                          |
| R1                         | GGCAACGCGTTCTAGAAAAAAAGCACCG<br>ACTCGGTGC                       |                                                                 |
| 6*Gly-BS1-F                | GGTGGCGGAGGGGGTGGCATGAACGGCG<br>GAAGCACCGTTTCCT                 | To amplify CDS of <i>BS1</i>                                    |
| BS1-attB2-R                | GGGGACCACTTTGTACAAGAAAGCTGGGT<br>CTTAGCATTCTTGAACATCTTTATCA     |                                                                 |
| MtASK1-5'UTR-F             | AGGGTTAGCGATTTACAAA                                             | To amplify CDS and UTR<br>of <i>MtASK1</i>                      |
| MtASK1-3'UTR-R             | TCTACATTGCGGAACCTTTGA                                           |                                                                 |

|                  |                                                              |                                                      |
|------------------|--------------------------------------------------------------|------------------------------------------------------|
| MtASK2-5'UTR-F   | TCGAAAAGGGGAAGAACAAT                                         | To amplify CDS and UTR of <i>MtASK2</i>              |
| MtASK2-3'UTR-R   | AGATCCTTGACTTAGATGCT                                         |                                                      |
| MtASK-F          | CACCATGTCTTCAACAAGAAAGATCACTCT                               | To amplify CDS of <i>MtASK1</i> and <i>MtASK2</i>    |
| MtASK-R          | TTCAAATGCCCATTTGGTTTTCCCTAC                                  |                                                      |
| MtCUL1-F         | CACCATGAGTGAACGGAAGACTATTG                                   | To amplify CDS of <i>MtCUL1</i>                      |
| MtCUL1-R         | AGCCAAGTACTTGAACAAATTTGCATTA                                 |                                                      |
| MtCUL2-F         | CACCATGTCAATGAGTGAAAGGAAAA                                   | To amplify CDS of <i>MtCUL2</i>                      |
| MtCUL2-R         | AGCTAAGTACTTGAACATATTTGGATTCTC                               |                                                      |
| MtWD40-1-attB1-F | GGGGACAAGTTTGTACAAAAAAGCAGGCT<br>TCATGGATAATTCAACACAAGAATCCC | To amplify CDS of <i>MtWD40-1</i>                    |
| MtWD40-1-attB2-R | GGGGACCACTTTGTACAAGAAAGCTGGGT<br>CAACCCCTCAAAGCTGCATT        |                                                      |
| RT-SLB1-F        | CACCATGTCTTCTTCTCCTCCTCCT                                    | For RT-PCR analysis of <i>SLB1</i>                   |
| RT-SLB1-R        | CTGTACACTAAAATCCAATA                                         |                                                      |
| RT-MtActin-F     | TCTTACTCTCAAGTACCCCATGAGC                                    | For RT-PCR analysis of <i>MtActin</i>                |
| RT-MtActin-R     | GTGGGAGTGCATAACCCTCATAGATT                                   |                                                      |
| qSLB1-F          | GGCCACTCAAGTTGCCATTG                                         | For quantitative RT-PCR analysis of <i>SLB1</i>      |
| qSLB1-R          | ATCCGAACGTGACACTTCCC                                         |                                                      |
| qMtCYCD-F        | TCTTGGATGGAAGATGAGTCCAGC                                     | For quantitative RT-PCR analysis of <i>MtCYCD</i>    |
| qMtCYCD-R        | ACATGAACCATTGTAGCAGTTGCC                                     |                                                      |
| qMtH4-F          | AAGGGTGGTGCTAAGCGTCACCGC                                     | For quantitative RT-PCR analysis of <i>MtH4</i>      |
| qMtH4-R          | TGTTCAAGTGTAAGTGACAGCATCACG                                  |                                                      |
| qRT-MtActin-F    | TCAATGTGCCTGCCATGTATGT                                       | For quantitative RT-PCR analysis of <i>MtActin</i>   |
| qRT-MtActin-R    | ACTCACACCGTCACCAGAATCC                                       |                                                      |
| qGmActin11-F     | ATCTTGACTGAGCGTGGTTATTCC                                     | For quantitative RT-PCR analysis of <i>GmActin11</i> |
| qGmActin11-R     | GCTGGTCCTGGCTGTCTCC                                          |                                                      |
